# Supplementary material
Source: PubMed Central journal article supplement (PMC5210763)
Supplement: supp_pp.16.01653_01653Supplemental_Table_S1.pdf [file supp_pp.16.01653_01653Supplemental_Table_S1.pdf]

Supplemental Table S1

| Gene                         | Primer sequence                                                      | Purpose                        |
|------------------------------|----------------------------------------------------------------------|--------------------------------|
| Os02g51300                   | 5' GCTGCCAGGTCATATGATGTTGCAG 3'<br>5' CATTCTGGCTTAGACGCAAGCAGCTTC 3' | RT-PCR                         |
| Os02g51310                   | 5' CATCGCGTTCTACGACATCCAG 3'<br>5' TCATCGTCGTCGTCGCCAC 3'            | RT-PCR                         |
| Os02g51320 ( <i>OsBUL1</i> ) | 5' ATGTCGAGCAGAAGGTCGTC 3'<br>5' TCAGGAGCGGAGGATGCTG 3'              | RT-PCR                         |
| Os02g51320 ( <i>OsBUL1</i> ) | 5' GCAGAAGGTCGTCGCGTGGCTCCATC 3'<br>5' GCGGAGGATGCTGCGGATGATCTCCG 3' | qRT-PCR                        |
| At5g39860 ( <i>PRE1</i> )    | 5' GTCGAACAGAAGATCAAGGCAATC 3'<br>5' ACATGAGTAGGCTTCTAATAACG 3'      | RT-PCR                         |
| <i>OsBUI</i>                 | 5' CTCATCTCTTCTCATCTgTTCTTC 3'<br>5' ATCAGTAGTACACCGAGATGAGTA 3'     | qRT-PCR                        |
| <i>OsBUL2</i>                | 5' TCGATCCTAGCTCTATCAGTAGCT 3'<br>5' AGTACATACCAAACAAGACAACCC 3'     | qRT-PCR                        |
| <i>OsBUL3</i>                | 5' TCGGGGCGGCGAGCATCGGGCAGG 3'<br>5' GCTCCGACAGCCGCTCGCTCAGGT 3'     | qRT-PCR                        |
| <i>OsILH1</i>                | 5' TCGAGCAGCCGGAGGTCGCGCTCA 3'<br>5' TGATGTAGCTGCACGTCTCCAGCA 3'     | qRT-PCR                        |
| Os03g43910 (LO9-177)         | 5' AACAATGCTTTGCGGAGGTGT 3'<br>5' TAATCAAGCGGACTTTCAAGGTC 3'         | qRT-PCR                        |
| Os03g43910 (LO9-177)         | 5' ATGGAGAAGTCGCCCGCGGAG 3'<br>5' TTAATCAAGCGGACTTTCAAGGTC 3'        | RT-PCR                         |
| Os09g33580 ( <i>OsBC1</i> )  | 5' AGTAGGGGAGCCAAGGCAAG 3'<br>5' CAGACAAGGGGATGGACTCG 3'             | qRT-PCR                        |
| Os09g33580 ( <i>OsBC1</i> )  | 5' ATGGCAGGCTTCTCACAC 3'<br>5' CTA CTGGAAAGAGCACATG 3'               | RT-PCR                         |
| <i>OsEXPA1</i> (Os04g15840)  | 5' AGTGACGCTTCAGGAACGAT 3'<br>5' TAGTCGCACATGATCCGGTA 3''            | qRT-PCR                        |
| <i>OsEXPA2</i> (Os01g60770)  | 5' CTCCAGATCGGCGTGTACC 3'<br>5' AGTAGGAGTGCCCGTTGATG 3'              | qRT-PCR                        |
| <i>OsEXPA3</i> (Os05g19570)  | 5' TCCCCGTCAACTACAAGAGG 3'<br>5' TCACGGTCACAAGCTCAAAG 3'             | qRT-PCR                        |
| <i>OsEXPA4</i> (Os05g39990)  | 5' GCGTCTCTTCTCCTCTT 3'<br>5' ACCCTGGCTGTACAGGTTG 3'                 | qRT-PCR                        |
| <i>OsXTH1</i> (Os04g51460)   | 5' GATCCGGGAGATGAAGAACCA 3'<br>5' TCCATCTGCTGGTCGTACCC 3'            | qRT-PCR                        |
| <i>OsXTR1</i> (Os11g33270)   | 5' GGAGCCGTACATCCTGCAGA 3'<br>5' AGGCTGGAGTAGAGCTTCATCG 3'           | qRT-PCR                        |
| <i>OsUBQ2</i>                | 5' GGTCATCCCGAGCCTCTGTT 3'<br>5' GCAAATGAGCAAATTGAGCA 3'             | qRT-PCR (Tanaka et al., 2009)  |
| <i>OsUBQ</i>                 | 5' AACCAGCTGAGGCCAAGA 3'<br>5' ACGATTGATTTAACCAGTCCATGA 3'           | RT-PCR (Komiya et al., 2008)   |
| <i>OsAct</i>                 | 5' CTCCCCATGCTATCCTTCG 3'<br>5' TGAATGAGTAACCACGCTCCG 3'             | qRT-PCR (Caldana et al., 2007) |
| <i>OsAct</i>                 | 5' TCCATCTTGGCATCTCTCAG 3'<br>5' GTACCCGCATCAGGCATCTG 3'             | RT-PCR (Zhang et al., 2005)    |

|                          |                                                                               |        |
|--------------------------|-------------------------------------------------------------------------------|--------|
| <i>Arabidopsis UBQ10</i> | 5' GATCTTGCCGAAAACAATTGGAGGATGGT 3'<br>5' CGACTTGCATTAGAAAAGAAAGAGATAACAGG 3' | RT-PCR |
|--------------------------|-------------------------------------------------------------------------------|--------|
